# Supplementary material
Source: publisher site journal article supplement (https://www.dovepress.com/article/343263)
Supplement: Supplementary file 1 [file get_supplementary_file.php]

**Supplementary material**

**Docking study, synthesis, and anti-inflammatory potential of some new pyridopyrimidine-derived compounds**

**Experimental**

*4.2.1.* *Colorimetric assay of COX-1/COX-2.*

The *in-vitro* COX-1/COX-2 (ovine) inhibitory activity evaluation of the target compounds was executed utilizing an enzyme immunoassay (EIA) kit (Cayman Chemical, Ann Arbor, MI) following the reported procedure [20].

*4.2.2.*   *Anti-inflammatory activity (in-vivo).*

Male rate (*Wister albino*) weighted from 120 to 150g were utilized in this experiment. The rats were lived at controlled environment (humidity 60 ± 10%, and temperature 27 ± 2 o C, light period of 12 h/day), and with admittance to food and water. All experiments were prepared in compliance with the rules of laboratory animals care. Carrageenan induced paw edema method was applied for assessment of the anti-inflammatory activity of the target compounds [40]. Rats were categorized into 11 groups (three animals per group). Vehicle was administered with first group; the celecoxib was administrated with second animal group and the remaining nine groups were administrated with the test compounds **IIIa–i** (one group for one compound, in 50 mg/kg dose). Celecoxib, pyridopyrimidinones, or vehicle were administrated by one hour before making of paw edema at the rat left hind paw through carrageenan subcutaneous injection in concentration of 1% in saline (0.05 mL/rat). Induction of paw edema was conducted by using one injection at sub-plantar of 0.02 ml (carrageenan in normal saline 1%). We used Vernier calipers for assessment of the paw thickness after 1, 3 and 5 h of carrageenan injection, and the differences in paw volume were estimated. The estimation of anti-inflammatory activity was calculated through the determination of inhibition percentage of edema thickness in treated animals and the control group, Table 2 according to the following formula:

Edema inhibition (%) = ((Na*-Nb**)/Na*) × 100

**Na* was the difference (average in volume between the left and right) hind paw of control group

***Nb* was the difference (average in volume between the left and right) hind paw of drug-treated group

**4.2.3. Ulcerogenic liability**

The gastric ulcerogenic liability of the most active pyridopyrimidinones **IIIf, IIIg, IIIh** and standards (celecoxib and indomethacin) were determined rendering to the formerly reported method [52]. Before drug administration, eighteen fasted (for 18h) were allocated into 6 groups. The control group was administrated vehicle only (2.5% in solvent, tween 80). Other groups were administrated a dose of 50 mg/kg of pyridopyrimidinones **IIIf, IIIg, IIIh**, celecoxib and indomethacin. Animals were nourished after two hours. For three successive days, the rats were administrated with the requisite dose. After last dose administration, the rats’ stomach was cut, opened (with greater curvature) and washed with normal saline. The examination of isolated stomach was done using pins for stretching and straightening on a corkboard. The examination of gastric mucosa for detection of ulcers was done by illuminated magnifying lens (l0x). The ulcer index was estimated and calculated following to Cho and Ogle method [52]. Also the transparent ruler was used for determination of lesions. 1 mm of ulcer was equivalent to five hemorrhagic spot. So the ulcer index (mm) was calculated through the summation of both the total length of ulcers and hemorrhagic spots in each stomach.

References

20) Abdelgawad, M.A.; Bakr, R.B.; El-Gendy, A.O.; Kamel, G.M.; Azouz, A.A.; Bukhari, S.N.A. Discovery of a cox-2 selective inhibitor hit with anti-inflammatory activity and gastric ulcer protective effect. Future medicinal chemistry 2017, 9, 1899-1912

40) Bakr, R.B.; Ghoneim, A.A.; Azouz, A.A. Selective cyclooxygenase inhibition and ulcerogenic liability of some newly prepared anti-inflammatory agents having thiazolo [4, 5-d] pyrimidine scaffold. Bioorganic Chemistry 2019, 102964..

52). Cho, C.H.; Ogle, C.W. Cholinergic-mediated gastric mast cell degranulation with subsequent histamine h1-and h2-receptor activation in stress ulceration in rats. European journal of pharmacology 1979, 55, 23-33.
